# Supplementary material
Source: Elsevier journal article supplement (https://www.sciencedirect.com/science/article/pii/S0025775316304171)
Supplement: mmc1 [file S0025775316304171:mmc1.doc]

| **Nombre y apellidos** | **Lugar de trabajo** | **Localidad** | |
| --- | --- | --- | --- |
| Margarita Criado Larumbe | IMIBIC/Hospital Reina Sofía/Universidad deCórdoba | Córdoba | |
| Rafael del Pozo Guzmán | Centro de Salud (CS) Occidente | Córdoba | |
| Gloria Molina Ortega | CS Occidente | Córdoba | |
| Victoria Luque Carabot | CS Occidente | Córdoba | |
| Gemma Moreno Fernández | CS Occidente | Córdoba | |
| Jesús Nieves Rodríguez | CS Occidente | Córdoba | |
| Mª de los Ángeles Diéguez García | CS Occidente | Córdoba | |
| Miguel Muñoz Álamo | CS Occidente | Córdoba | |
| Caridad Dios Guerra | CS Occidente | Córdoba | |
| Clementina Jiménez Martínez | CS Occidente | Córdoba | |
| Mª del Mar Gómez Fernández | CS Occidente | Córdoba | |
| José Ángel Fernández García | Consultorio Villarrubia (CS Occidente) | Córdoba | |
| Patricia Bajo Carrión | Consultorio Villarrubia (CS Occidente) | Córdoba | |
| Jorge Martínez de la Iglesia | CS Lucano | Córdona | |
| Irene Moyano Jiménez | CS Lucano | Córdoba | |
| María Salud Cano García | CS Lucano | Córdoba | |
| Juana Redondo Sánchez | CS Lucano | Córdoba | |
| Marisol de Cristino Espinar | Dispositivo de Urgencias (DCCU) Sector Sur | Córdoba | |
| Amelia Camacho Buenosvinos | DCCU Avda. América | Córdoba | |
| Rafaela Muñoz Gómez | CS Sector Sur | Córdoba | |
| Jesús Serrano Merino | CS Sector Sur | Córdoba | |
| Alfredo Saez Lara | CS Sector Sur | Córdoba | |
| Pascual Ponferrrada Caballero | CS Sector Sur | Córdoba | |
| Manuel Navarrete Espejo | CS Sector Sur | Córdoba | |
| Manuel Durán Serrat | CS Sector Sur | Córdoba | |
| Domingo Rojas Bejarano | CS Sector Sur | Córdoba | |
| Concha Zurbano Ortiz | CS Sector Sur | Córdoba | |
| Ángeles Pastor López | CS Aeropuerto | Córdoba | |
| Mercedes Garrido Aranda | CS Aeropuerto | Córdoba | |
| Mª Dolores Maestre Serrano | CS Guadalquivir | Córdoba | |
| Mª Paz Gutiérrez Martín | CS Guadalquivir | Córdoba | |
| Carmen Guzman Moreno | CS Guadalquivir | Córdoba | |
| Santiago Cruz Velarde | CS Guadalquivir | Córdoba | |
| Francisco Rubio Moreno | CS Guadalquivir | Córdoba | |
| Luis Heredia Borrego | CS Guadalquivir | Córdoba | |
| Yolanda Sánchez Palomo | CS Guadalquivir | Córdoba | |
| Enrique Martín Rioboó | CS Fuensanta | Córdoba | |
| Fco. Javier Ruiz Moruno | CS Fuensanta | Córdoba | |
| Emilio García Criado | CS Fuensanta | Córdoba | |
| Pilar Portillo Ramírez | CS Fuensanta | Córdoba | |
| Paulina Menéndez Sagrado | CS Fuensanta | Córdoba | |
| Mª Reyes Martínez Guillén | CS Fuensanta | Córdoba | |
| Mª Ángeles Ortega Osuna | CS Fuensanta | Córdoba | |
| Lourdes Galisteo Garrido | CS Fuensanta | Córdoba | |
| Antonio Lara Moscoso | CS Fuensanta | Córdoba | |
| Alicia Blanco Negrero | CS Fuensanta | Córdoba | |
| Virginia Llamazares Muñoz | CS Fuensanta | Córdoba | |
| Manuel Barbado Gómez | CS Fuensanta | Córdoba | |
| Virginia González Blanco | CS Fuensanta | Córdoba | |
| Teresa Martínez de la Torre | CS Poniente | Córdoba | |
| Martín Pinilla Fernández Castañón | CS Poniente | Córdoba | |
| Rafael Martínez Ponferrada | CS Poniente | Córdoba | |
| Maritri Lechuga Varona | CS Santa Rosa | Córdoba | |
| Ana Mª Pérez Trujillo | CS Santa Rosa | Córdoba | |
| Cristina Aguado Taberné | CS Santa Rosa | Córdoba | |
| José Espejo Espejo | CS Santa Rosa | Córdoba | |
| Isabel Salido Morales | CS Santa Rosa | Córdoba | |
| Mª del Mar Cillero Rodríguez | CS Santa Rosa | Córdoba | |
| Maritza Riofrío Leines | CS Santa Rosa | Córdoba | |
| Mª Auxiliadora Cabanas Espejo | CS Santa Rosa | Córdoba | |
| Araceli Reyes Torres | CS Santa Rosa | Córdoba | |
| Inmaculada Gavilán Pedrajas | CS Santa Rosa | Córdoba | |
| Cristina Soto Díaz | CS Santa Rosa | Córdoba | |
| Cristina Castro Fernández | CS Santa Rosa | Córdoba | |
| Francisca Martínez Rivas | CS Santa Rosa | Córdoba | |
| Ana Bares García | CS Santa Rosa | Córdoba | |
| María Lovera Guerrero | CS Santa Rosa | Córdoba | |
| Ana Roldán Villalobos | CS Huerta de la Reina | Córdoba | |
| Irene Moreno Montero | CS Huerta de la Reina | Córdoba | |
| Manuela Urbano Priego | CS Huerta de la Reina | Córdoba | |
| Antonio León Dugo | Unidad de Gestión Clínica (UGC) Levante Sur | Córdoba | |
| Mª Dolores Domínguez Manrique | UGC Levante Sur | Córdoba | |
| Antonio Montero Cantero | UGC Levante Sur | Córdoba | |
| Bartolomé Pérez Pérez | UGC Levante Sur | Córdoba | |
| Isabel de Andrés Cara | UGC Levante Sur | Córdoba | |
| Laura Serrano Pajuelo | UGC Levante Sur | Córdoba | |
| María Pineda Alonso | UGC Levante Sur | Córdoba | |
| Victoriano Rodríguez Navarro | CS La Carlota | La Carlota (Córdoba) | |
| Leonor Garcia de Vinuesa Garijo | CS La Carlota | La Carlota (Córdoba) | |
| Victoria López Ruiz | CS La Carlota | La Carlota (Córdoba) | |
| Rosario Villa Caro | CS La Carlota | La Carlota (Córdoba) | |
| Cayetana Morales Ruiz | CS La Carlota | La Carlota (Córdoba) | |
| Pilar Serrano Varo | CS Posadas | Posadas (Córdoba) | |
| Antonio López Hernández | CS Posadas | Posadas (Córdoba) | |
| Ana Belén Ortega Cañada | CS Posadas | Posadas (Córdoba) | |
| Manuela Ruiz García | CS Posadas | Posadas (Córdoba) | |
| Fátima Silva Gil | CS Posadas | Posadas (Córdoba) | |
| Ana Belén Gómez Santos | CS Posadas | Posadas (Córdoba) | |
| Carmen Jurado Porcuna | CS Posadas (Guadalcázar) | Guadalcázar (Córdoba) | |
| Luís Palenzuela Rodríguez | CS Posadas | Posadas (Córdoba) | |
| José Antonio Gascón Jiménez | CS Fernán Núñez | Fernán-Núñez (Córdoba) | |
| Pedro Villalba Marín | CS Fernán Núñez | Fernán Núñez - La Rambla (Córdoba) | |
| Mª Dolores Conde Ros | CS Fernán Núñez (Consultorio Montemayor) | Montemayor (Córdoba) | |
| Epifanio Jiménez Luque | UGC Castro del Rio | Castro Del Río (Córdoba) | |
| César Sánchez Nieto | UGC Castro del Rio | Espejo (Córdoba) | |
| Juan Merino Polo | UGC Castro del Rio | Espejo (Cordoba) | |
| José Mª Castro Ramírez | UGC Castro del Rio | Castro Del Río (Córdoba) | |
| Matilde Sánchez Ruiz | UGC Castro del Rio | Castro Del Río (Córdoba) | |
| Eloisa García Molina | UGC Castro del Rio | Castro Del Río (Córdoba) | |
| Patricio Rafael Cauqui Domínguez | UGC Castro del Rio | Castro Del Río (Córdoba) | |
| Mª Carmen Ferrezuelo Cañete | UGC Castro del Rio | Castro Del Río (Córdoba) | |
| Mª Raquel Arias Vega | DCCU Priego de Córdoba | Priego de Córdoba (Córdoba) | |
| Juan Vicente Soria López | DCCU Priego de Córdoba | Priego de Córdoba (Córdoba) | |
| Josefina Gálvez Moral | CS Cabra | Cabra (Córdoba) | |
| Clara Estela Moreno Agüera | CS Cabra | Cabra (Córdoba) | |
| Rafael Salido Aparicio | DCCU Puente Genil | Puente Genil (Córdoba) | |
| Inmaculada Muñoz Gámiz | DCCU Lucena | Lucena (Córdoba) | |
| Enrique Rodríguez Guerrero | CS Lucena I | Lucena (Córdoba) | |
| Cristina Bellido Moyano | CS Lucena I | Lucena (Córdoba) | |
| Salvadora López Escudero | UGC Guadiato | Peñarroya (Córdoba) | |
| Juan Manuel Parras Rejano | UGC Guadiato | Peñarroya (Córdoba) | |
| Rafael Alcaide López | UGC Guadiato | Peñarroya (Córdoba) | |
| Concepción Bernete Medina | UGC Guadiato | Peñarroya (Córdoba) | |
| Manuel López Martínez | UGC Guadiato | Villanueva del Rey (Córdoba) | |
| Juan Ignacio González Carretero | UGC Guadiato | Peñarroya (Córdoba) | |
| Manuel Castillo del Toro | UGC Guadiato | Espiel (Córdoba) | |
| Eva Perea Moreno | UGC Guadiato | Belmez (Córdoba) | |
| Carmen Rosa Moreno Serrano | UGC Guadiato | Peñarroya (Córdoba) | |
| Carlos Pérula de Torres | UGC La Sierra | Villaviciosa (Córdoba) | |
| Francisco Escribano Villanueva | UGC La Sierra | Villaviciosa (Córdoba) | |
| Jose Antonio Hoyos Esteban | UGC La Sierra | Villaviciosa (Córdoba) | |
| Ricardo García- Arévalo Arellano | CS Pozoblanco | Pozoblanco (Córdoba) | |
| María Isabel Guisado Pérez | CS Pozoblanco | Pozoblanco (Córdoba) | |
| Rubén Ruano Azúa | CS Pozoblanco | Pozoblanco (Córdoba) | |
| Ángel Jara Palomares | CS Villa del Río | Villafranca de Córdoba | |
| Francisca Pérez Gómez | CS Montoro | Montoro (Córdoba) | |
| Francisco Buitrago Ramírez | CS La Paz | Badajoz | |
| María Alegre Batlle | ABS Argentona | Argentona (Barcelona) | |
| José Ignacio Menjón Urchaga | ABS Argentona | Argentona (Barcelona) | |
| Mario NAvajas Cuenca | (Area Básica de Salud (ABS) Argentona | Argentona (Barcelona) | |
| Laura Mateu Fernández | ABS Argentona | Dosrius (Barcelona) | |
| Mònica Papiol Rufias | ABS Argentona | Argentona (Barcelona) | |
|  | ABS Argentona | Argentona (Barcelona) | |
| Miguel Ángel Martínez Adell | ABS Argentona | Argentona/Òrrius (Barcelona) | |
| Marta Comellas Blanchart | ABS Argentona | Argentona (Barcelona) | |
| Concepció Esteva Armengol | ABS Argentona | Argentona (Barcelona) | |
| Jordi Lloret Pérez | ABS Argentona | Argentona (Barcelona) | |
| Mar Mir Manzanas | ABS Argentona | Argentona (Barcelona) | |
| María Teresa González Álvarez | ABS Argentona | Argentona (Barcelona) | |
| Mª Dolores Casabella Durán | Centro de Atención Primaria (CAP) Cirera-Molins | Mataró (Barcelona) | |
| Mª Consuelo García Riera | CAP Cirera-Molins | Mataró (Barcelona) | |
| Lucía Jurado Muñoz | CAP Cirera-Molins | Mataró (Barcelona) | |
| Ana Mª Palacios Hernández | CAP Cirera-Molins | Mataró (Barcelona) | |
| Ana Roces Bergantiños | CAP Cirera-Molins | Mataró (Barcelona) | |
| Isabel Villarroya Mateu | CAP Cirera-Molins | Mataró (Barcelona) | |
| Pere Mª Flores Muxí | CAP Cirera-Molins | Mataró (Barcelona) | |
| Vanessa Marta Becerra | CAP Cirera-Molins | Mataró (Barcelona) | |
| Monserrat Pubill Sucarrat | CAP Cirera-Molins | Mataró (Barcelona) | |
| Pere Serra Cabot | CAP Cirera-Molins | Mataró (Barcelona) | |
| Eulalia Torrellas Font | CAP Cirera-Molins | Mataró (Barcelona) | |
| Dorte Skifter Voss | CAP Cirera-Molins | Mataró (Barcelona) | |
| Teresa Graell Riera | CAP La Marina | Barcelona | |
| Cristina Serrano Morales | CAP La Marina | Barcelona | |
| Natividad Martín Peña | CAP La Marina | Barcelona | |
| José Miguel Baena Diez | CAP La Marina | Barcelona | |
| Ylenia García Navarro | CAP La Marina | Barcelona | |
| Consuelo Isabel Simón Muela | CAP La Marina | Barcelona | |
| Manel García Lareo | CAP La Marina | Barcelona | |
| Rosario Hernández Ibáñez | CAP La Marina | Barcelona | |
| Isabel Duaso Allué | CAP La Marina | Barcelona | |
| Mª Fe Adrián Garcia | Verdaguer de SJD | Sant Joan Despí (Barcelona) | |
| Eduardo Marco Carmona | Verdaguer de SJD | Sant Joan Despí (Barcelona) | |
| José Fraj Lázaro | Verdaguer de SJD | Sant Joan Despí (Barcelona) | |
| Eva García Tarrida | Verdaguer de SJD | Sant Joan Despí (Barcelona) | |
| Javier Ateca Díaz | Verdaguer de SJD | Sant Joan Despí (Barcelona) | |
| Mª Isabel Collado Montero | Les Planes de SJD | Sant Joan Despí (Barcelona) | |
| Carlos Busquier Marco | Les Planes de SJD | Sant Joan Despí (Barcelona) | |
| Francesca Serra Caila | Les Planes de SJD | Sant Joan Despí (Barcelona) | |
| Montserrat Coma Solé | Les Planes de SJD | Sant Joan Despí (Barcelona) | |
| María Bartolomé Regué | ABS Mataró-Centre | Mataró (Barcelona) | |
| Enric Corona Colldeforn | ABS Mataró-Centre | Mataró (Barcelona) |  |
| Anna Ramón Krauel | ABS Mataró-Centre | Mataró (Barcelona) |  |
| María Montesino Teruel | ABS Mataró-Centre | Mataró (Barcelona) |  |
| Gemma Brugarola Guibas | ABS Mataró-Centre | Mataró (Barcelona) |  |
| Remedios Martín Álvarez | CAP Vallcarca | Barcelona |  |
| Manuel Campiñez Navarro | CAP Vallcarca | Barcelona |  |
| Anna Altes Caïs | CAP Vallcarca | Barcelona |  |
| Gina Ballester Aller | CAP Vallcarca | Barcelona |  |
| Ruth Berdier Soriano | CAP Vallcarca | Barcelona |  |
| Nieves Barragán Brun | CAP Vallcarca | Barcelona |  |
| Mario Beza Fredes | CAP Vallcarca | Barcelona |  |
| Rosa Yrla Figueras | CAP Vallcarca | Barcelona |  |
| David García Bonias | CAP Vallcarca | Barcelona |  |
| Nuria Cortes Samora | CAP Vallcarca | Barcelona |  |
| Mireia Artola Ramón | CAP Vallcarca | Barcelona |  |
| Tanit Iribarne Serra | CAP Sant Gervasi | Barcelona |  |
| Alexis Tena Domingo | CAP Sant Gervasi | Barcelona |  |
| Marc Girones Sainz | CAP Sant Gervasi | Barcelona |  |
| Rosario Jiménez Leal | CAP Sant Gervasi | Barcelona |  |
| Rosi Corral Antón | CAP Sant Gervasi | Barcelona |  |
| Miriam Payan Cruz | CAP Sant Gervasi | Barcelona |  |
| María Garro Giménez | CAP Sant Gervasi | Barcelona |  |
| Maribel Yerga Mateos | CAP Sant Gervasi | Barcelona |  |
| Mª José Jiménez de Gaztañondo | Equipo de Atención Primaria (EAP) Dreta Eixample | Barcelona |  |
| Joan Josep Gil Calvo | EAP Dreta Eixample | Barcelona |  |
| Elena Galindo Montané | EAP Dreta Eixample | Barcelona |  |
| Meri Zell del Castillo Nesweda | EAP Dreta Eixample | Barcelona |  |
| Lluís Cuixart Costa | EAP Dreta Eixample | Barcelona |  |
| Mª Victoria Mazo Ancochea | EAP Dreta Eixample | Barcelona |  |
| Silvia Zamora Mestres | EAP Dreta Eixample | Barcelona |  |
| Montserrat Freixas Laporta | EAP Dreta Eixample | Barcelona |  |
| Agnès Martí Braso | EAP Dreta Eixample | Barcelona |  |
| Mercè Cervera León | EAP Dreta Eixample | Barcelona |  |
| Verónica Sierra Peinado | EAP Dreta Eixample | Barcelona |  |
| Nerea Mogeda Marina | EAP Dreta Eixample | Barcelona |  |
| David Ginesta López | EAP Dreta Eixample | Barcelona |  |
| Sandra Martínez Durán | EAP Dreta Eixample | Barcelona |  |
| Xènia Partegas Torres | EAP Dreta Eixample | Barcelona |  |
| Ingrid Fort García | EAP Dreta Eixample | Barcelona |  |
| Jaume Collado Sánchez | EAP Dreta Eixample | Barcelona |  |
| Montserrat González-Moreno Portugal | EAP Dreta Eixample | Barcelona |  |
| Montserrat Verdú Arnal | EAP Dreta Eixample | Barcelona |  |
| Cristina Echebarria Manresa | EAP Dreta Eixample | Barcelona |  |
| Nuria Peraire Orcal | EAP Dreta Eixample | Barcelona |  |
| Ana García Solana | EAP Dreta Eixample | Barcelona |  |
| Ana Campoy Sánchez | CAP Can Bou | Castelldefels (Barcelona) |  |
| Agustina Malo Verde | CAP Can Bou | Castelldefels (Barcelona) |  |
| Antonia Noguera Argelés | CAP Can Bou | Castelldefels (Barcelona) |  |
| Dolors Torres Roca | CAP Can Bou | Castelldefels (Barcelona) |  |
| Francisca Pavón Rodríguez | CAP Can Bou | Castelldefels (Barcelona) |  |
| Isabel Casado Montañes | CAP Can Bou | Castelldefels (Barcelona) |  |
| Maite Fernández Delgado | CAP Can Bou | Castelldefels (Barcelona) |  |
| Montserrat Tapia López | CAP Can Bou | Castelldefels (Barcelona) |  |
| Yolanda Rodríguez Hernández | CAP Can Bou | Castelldefels (Barcelona) |  |
| Carles Bernades Carulla | CAP Can Bou | Castelldefels (Barcelona) |  |
| Claudia Gómez Fernández | CAP Can Bou | Castelldefels (Barcelona) |  |
| Daniel García Tristante | CAP Can Bou | Castelldefels (Barcelona) |  |
| Emilia Bosch Romero | CAP Can Bou | Castelldefels (Barcelona) |  |
| Laura Fabra García | CAP Can Bou | Castelldefels (Barcelona) |  |
| María Isabel Santamaría Martín | CAP Can Bou | Castelldefels (Barcelona) |  |
| Maria José Jareño Sanz | CAP Can Bou | Castelldefels (Barcelona) |  |
| Silvia González Azuara | CAP Can Bou | Castelldefels (Barcelona) |  |
| Susana Vilalta García | CAP Can Bou | Castelldefels (Barcelona) |  |
| Victor Silvestre Puerto | CAP Can Bou | Castelldefels (Barcelona) |  |
| Carmen Rodríguez Quevedo | El Prat 1 | El Prat de Llobregat (Barcelona) |  |
| Mª Dolores Peleato Catalán | El Prat 1 | El Prat de Llobregat (Barcelona) |  |
| Nuria Flores Gudiño | El Prat 1 | El Prat de Llobregat (Barcelona) |  |
| Nuria Sousa Nuñez | El Prat 1 | El Prat de Llobregat (Barcelona) |  |
| Bàrbara Navarro Arambudo | El Prat 1 | El Prat de Llobregat (Barcelona) |  |
| Joan Gallego Cuxart | El Prat 2 | El Prat de Llobregat (Barcelona) |  |
| Manel Salazar Rojas | El Prat 2 | El Prat de Llobregat (Barcelona) |  |
| Ester Pallarès Sanz | El Prat 3 | El Prat de Llobregat (Barcelona) |  |
| Marien Miñaño Cárceles | El Prat 3 | El Prat de Llobregat (Barcelona) |  |
| Sandra Riera Carmona | El Prat 3 | El Prat de Llobregat (Barcelona) |  |
| Sheila Sainz Galván | El Prat 3 | El Prat de Llobregat (Barcelona) |  |
| Jenifer Martínez Montes | El Prat 3 | El Prat de Llobregat (Barcelona) |  |
| MªCarmen Méndez Galeano | El Prat 3 | El Prat de Llobregat (Barcelona) |  |
| Salud Barragán Martín | El Prat 3 | El Prat de Llobregat (Barcelona) |  |
| Mª Nieves Maroto Villanova | El Prat 3 | El Prat de Llobregat (Barcelona) |  |
| Maribel Matilla Mont | El Prat 3 | El Prat de Llobregat (Barcelona) |  |
| Sofía Aguilar Sanz | CAP Sant Ildefons | Cornellá de Llobregat (Barcelona) |  |
| Marta Valls Esteve | CAP Sant Ildefons | Cornellá de Llobregat (Barcelona) |  |
| Judith Parcet Solsona | CAP Sant Ildefons | Cornellá de Llobregat (Barcelona) |  |
| Albert Portillo | CAP Sant Ildefons | Cornellá de Llobregat (Barcelona) |  |
| Manuel Álvarez Fernández | CAP Sant Ildefons | Cornellá de Llobregat (Barcelona) |  |
| Neus Domené Martí | CAP Sant Ildefons | Cornellá de Llobregat (Barcelona) |  |
| Miguel A. Diaz Herrera | CAP Sant Ildefons | Cornellá de Llobregat (Barcelona) |  |
| Marta D´Lacoste Farré | CAP Sant Ildefons | Cornellá de Llobregat (Barcelona) |  |
| Eva Mª Cabello Jurado | CAP Sant Ildefons | Cornellá de Llobregat (Barcelona) |  |
| Joan Clos Soldevilla | CAP Borrell | Barcelona |  |
| Mª Pilar Navarrete Durán | CAP Borrell | Barcelona |  |
| Isabel de Dios González | CAP Borrell | Barcelona |  |
| Mª Carme Alvira Balada | CAP Borrell | Barcelona |  |
| Cristina Colungo Francia | CAP Borrell | Barcelona |  |
| Marta Navarro Gonzalez | CAP Borrell | Barcelona |  |
| Amparo Hervás Docón | CAP Borrell | Barcelona |  |
| Sandra Murgui | CAP Borrell | Barcelona |  |
